# Supplementary material for: "Lost in Translation?": A Qualitative Exploration of Digital Perinatal Mental Health Resource Use Among Migrant Women
Source: Research Square preprint supplement (doi:10.21203/rs.3.rs-7466793/v1), 2025-09-05
Supplement: Supplementary file 1 [file 2d3d38302b51e56e23b953dc.docx]

# Demographic Information

What is your age range?

- 18 - 24
- 25 - 34
- 35 - 44
- 45 - 55

Do you come from a cultural background that speaks one of the following languages?

- Chinese
- Arabic
- Hindi

Were you born in Australia?

- Yes
- No

If no, which country were you born in?

___________________________________________________________________

How many years have you lived in Australia?

___________________________________________________________________

Where do you live?

- VIC
- NSW
- WA
- SA
- NT
- QLD
- TAS

Do you live in:

- A capital city or a large metropolitan city (For example, Geelong, Newcastle, Wollongong, Sunshine Coast, Gold Coast, Fremantle)
- Rural regions

What is the highest level of education you have?

- Grade 11 or less
- Year 12
- TAFE or vocational degree
- Bachelors degree
- Postgraduate degree

Which of the following statements best describes your relationship situation:

- Single
- Married or in a relationship
- Separated or divorced
- Widowed

Number of children

- 1
- 2 - 3
- 4 or more

Which websites did you look at?

- COPE
- PANDA
- Raisingchildren
- RAMA
- Multicultural Center for Women’s Health
