# Supplementary material for: "Lost in Translation?": A Qualitative Exploration of Digital Perinatal Mental Health Resource Use Among Migrant Women
Source: Research Square preprint supplement (doi:10.21203/rs.3.rs-7466793/v1), 2025-09-05
Supplement: Supplementary file 2 [file 309d327930399edf5baf85da.docx]

# Chinese-language speaking

| Participant | Age | Country of birth | Speaks English | Years lived in Australia | State | Metropolitan city or Rural regions | Education | Relationship status | Number of children |
| --- | --- | --- | --- | --- | --- | --- | --- | --- | --- |
| P1 | 35 – 44 | China | Yes | 8 | VIC | Metropolitan city | Postgraduate degree | Married or in a relationship | 2 – 3 |
| P2 | 25 – 34 | China | Yes | 6 | VIC | Metropolitan city | Postgraduate degree | Married or in a relationship | 2 – 3 |
| P3 | 35 – 44 | China | Yes | 16 | VIC | Metropolitan city | Bachelor’s degree | Married or in a relationship | 1 – 2 |
| P4 | 25 – 34 | China | Yes | 10 | VIC | Metropolitan city | Bachelor’s degree | Married or in a relationship | 1 |
| P5 | 35 – 44 | China | Yes | 22 | VIC | Metropolitan city | Postgraduate degree | Married or in a relationship | 2 – 3 |
| P6 | 25 – 34 | China | Yes | 11 | VIC | Metropolitan city | Postgraduate degree | Married or in a relationship | 2 – 3 |
| P7 | 25 – 34 | China | No | 10 | VIC | Metropolitan city | Postgraduate degree | Married or in a relationship | 1 |
| P8 | 25 – 34 | China | No | 15 | VIC | Metropolitan city | TAFE/vocational degree | Separated or divorced | 2 – 3 |
| P9 | 35 – 44 | China | No | 16 | VIC | Metropolitan city | Bachelor’s degree | Married or in a relationship | 2 – 3 |
| P10 | 35 – 44 | China | No | 19 | VIC | Rural region | Postgraduate degree | Separated or divorced | 1 |

# Indian-language speaking

| Participant | Age | Country of birth | Speaks English | Years lived in Australia | State | Metropolitan city or Rural regions | Education | Relationship status | Number of children |
| --- | --- | --- | --- | --- | --- | --- | --- | --- | --- |
| P1 | 25 – 34 | India | Yes | 10 | VIC | Metropolitan city | Postgraduate degree | Married or in a relationship | 1 |
| P2 | 35 – 44 | India | Yes | 10 | VIC | Rural region | Postgraduate degree | Married or in a relationship | 1 |
| P3 | 35 – 44 | India | Yes | 7 | VIC | Metropolitan city | Bachelor’s degree | Married or in a relationship | 2 – 3 |
| P4 | 45 – 55 | India | Yes | 7 | SA | Metropolitan city | Postgraduate degree | Separated or divorced | 1 |
| P5 | 25 – 34 | India | Yes | 8 | VIC | Rural region | Postgraduate degree | Married or in a relationship | 1 |
| P6 | 25 – 34 | India | Yes | 5 | VIC | Metropolitan city | Postgraduate degree | Married or in a relationship | 1 |
| P7 | 25 – 34 | India | Yes | 5 | VIC | Metropolitan city | Bachelor’s degree | Married or in a relationship | 1 |
| P8 | 25 – 34 | India | Yes | 7 | VIC | Metropolitan city | TAFE/vocational degree | Married or in a relationship | 2 – 3 |
| P9 | 45 – 55 | India | Yes | 15 | VIC | Metropolitan city | Postgraduate degree | Married or in a relationship | 2 – 3 |
| P10 | 35 – 44 | Bahrain | Yes | 11 | VIC | Metropolitan city | Bachelor’s degree | Married or in a relationship | 1 |

# Arabic-language speaking

| Participant | Age | Country of birth | Speaks English | Years lived in Australia | State | Metropolitan city or Rural regions | Education | Relationship status | Number of children |
| --- | --- | --- | --- | --- | --- | --- | --- | --- | --- |
| P1 | 25 – 34 | Palestine | No | 7.5 months | VIC | Rural regions | Bachelor’s degree | Married or in a relationship | 2 – 3 |
| P2 | 25 – 34 | Palestine | No | 6 months | VIC | Rural regions | Bachelor’s degree | Married or in a relationship | 1 |
| P3 | 35 – 34 | Palestine | No | 9 months | VIC | Rural regions | Bachelor’s degree | Married or in a relationship | 2 – 3 |
| P4 | 25 – 34 | Palestine | No | 8 months | VIC | Rural regions | Bachelor’s degree | Married or in a relationship | 1 |
| P5 | 25 – 34 | Palestine | No | 4 months | VIC | Metropolitan city | Bachelor’s degree | Married or in a relationship | 2 – 3 |
| P6 | 35 – 44 | Netherlands | Yes | 17 years | VIC | Metropolitan city | Postgraduate degree | Married or in a relationship | 1 |
| P7 | 35 – 44 | Iraq | No | 9 years | VIC | Metropolitan city | Year 12 | Married or in a relationship | 1 |
| P8 | 35 – 44 | Iraq | No | 29 years | VIC | Metropolitan city | Year 12 | Married or in a relationship | 4 or more |
| P9 | 35 – 44 | Iraq | No | 13 years | VIC | Metropolitan city | Grade 11 or less | Married or in a relationship | 2 – 3 |
| P10 | 45 – 55 | Iraq | No | 29 years | VIC | Metropolitan city | Grade 11 or less | Married or in a relationship | 4 or more |
